# Supplementary material for: PreImplantation Trial of Histopathology In renal Allografts (PITHIA): a stepped-wedge cluster randomised controlled trial protocol
Source: PubMed Central journal article supplement (PMC6340453; doi:10.1136/bmjopen-2018-026166), 2019-01-17
Supplement: bmjopen-2018-026166.reviewer_comments.pdf [file bmjopen-2018-026166.reviewer_comments.pdf]

## PEER REVIEW HISTORY

BMJ Open publishes all reviews undertaken for accepted manuscripts. Reviewers are asked to complete a checklist review form (<http://bmjopen.bmj.com/site/about/resources/checklist.pdf>) and are provided with free text boxes to elaborate on their assessment. These free text comments are reproduced below.

## ARTICLE DETAILS

|                            |                                                                                                                                                                    |
|----------------------------|--------------------------------------------------------------------------------------------------------------------------------------------------------------------|
| <b>TITLE (PROVISIONAL)</b> | Pre-Implantation trial of Histopathology In renal Allografts (PITHIA): A stepped-wedge cluster randomised control trial protocol                                   |
| <b>AUTHORS</b>             | Ayorinde, John; Summers, Dominic; Pankhurst, Laura; Laing, Emma; Deary, Alison; Hemming, Karla; Wilson, Edward; Bardsley, Victoria; Neil, Desley; Pettigrew, Gavin |

This article was not externally reviewed at BMJ Open. Protocols that have been independently assessed prior to submission to BMJ Open are usually fast-tracked to publication on the grounds that further substantial changes will not be possible. This independent assessment will usually be external, independent review for both a substantial grant award from a non-commercial or government funder and ethics approval.
